# Supplementary material for: Evaluation of stability and inactivation methods of SARS-CoV-2 in context of laboratory settings
Source: Springer Nature journal article supplement (doi:10.1007/s00430-021-00716-3), 2021-07-01

56°C

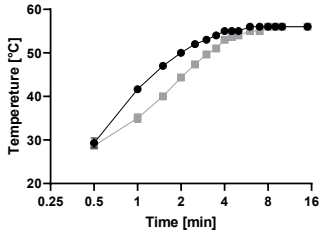

60°C

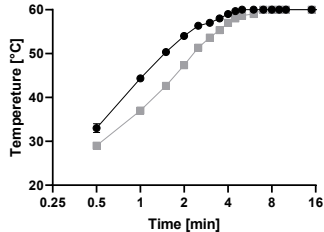

90°C

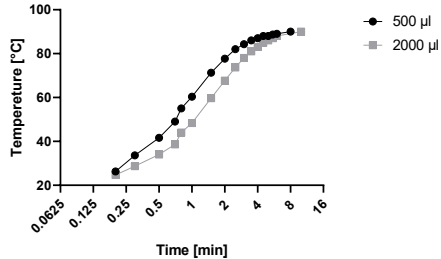

Supplement: MOESM2 [file 430_2021_716_MOESM2_ESM.pdf]
